# Supplementary material
Source: PubMed Central journal article supplement (PMC3655466)
Supplement: emboj201360df2c.pdf [file emboj201360df2c.pdf]

Fig.2C

Total PKM $\zeta$

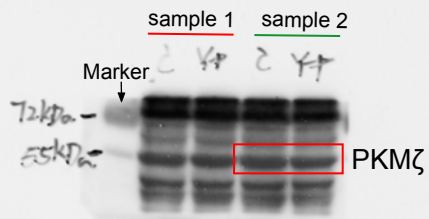

aPKC C-terminal antibody (sc-216)-11.23  
*total aPKC C-terminal antibody*

Total PSD95

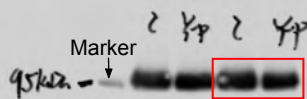

Total-PSD95  
Total aPKC C-terminal antibody  
2012.11.23

TIF PKM $\zeta$

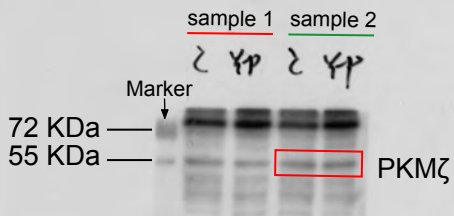

aPKC C-terminal antibody (sc-216)  
727  
*aPKC C-terminal antibody*  
2012.11.23

TIF PSD95

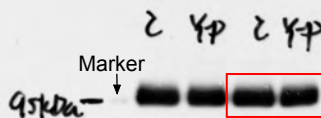

727-PSD95  
2012.11.23
