# Supplementary material
Source: PubMed Central journal article supplement (PMC3655466)

Fig 1B

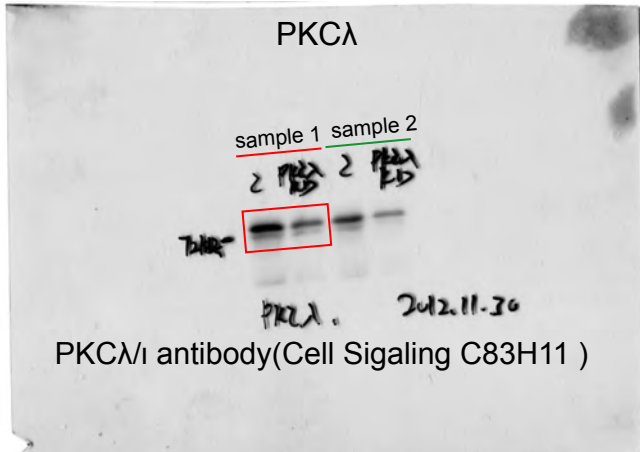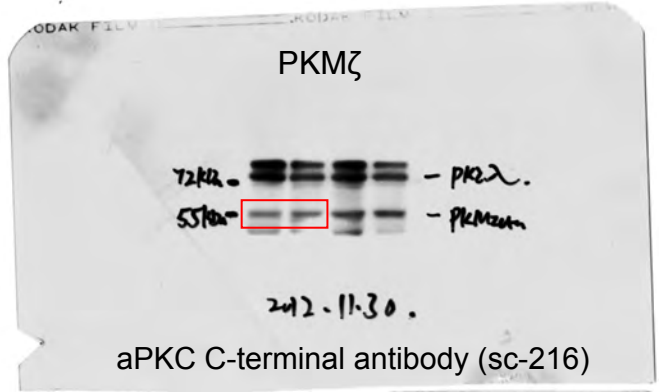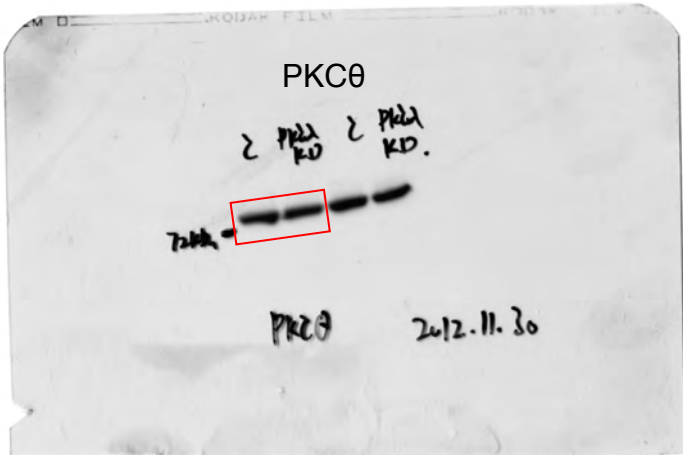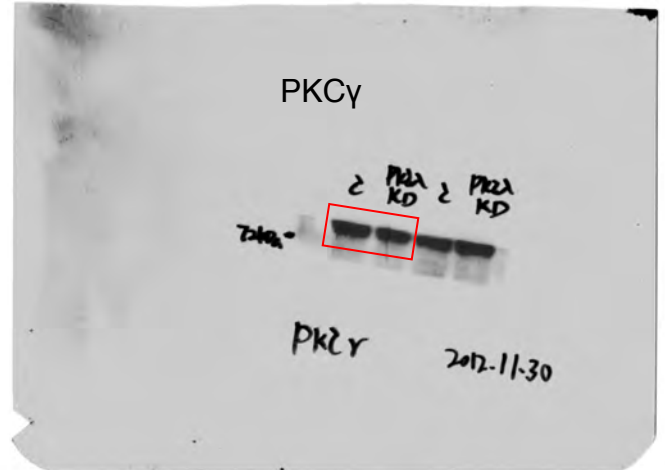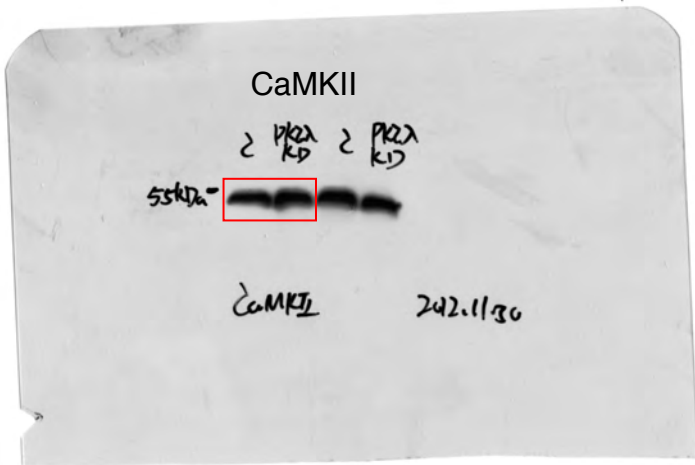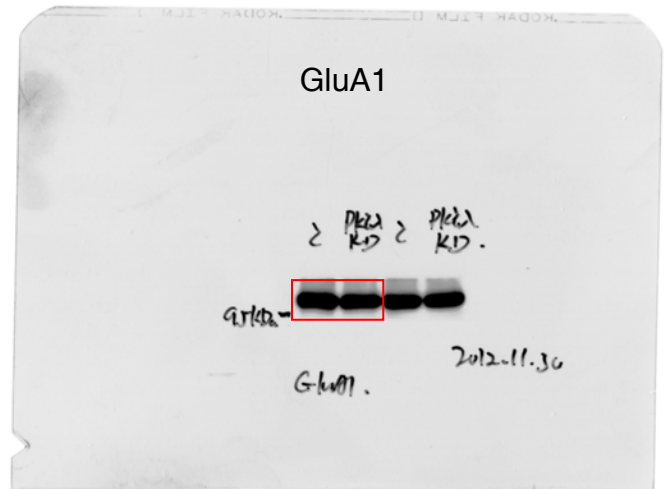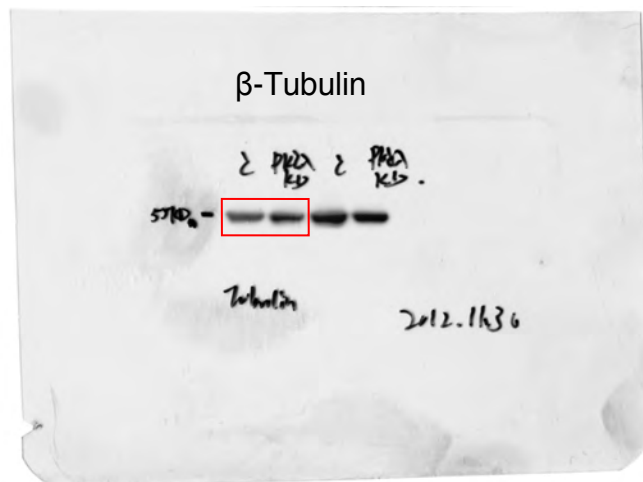

Supplement: emboj201360df1b.pdf [file emboj201360df1b.pdf]

Fig.2A

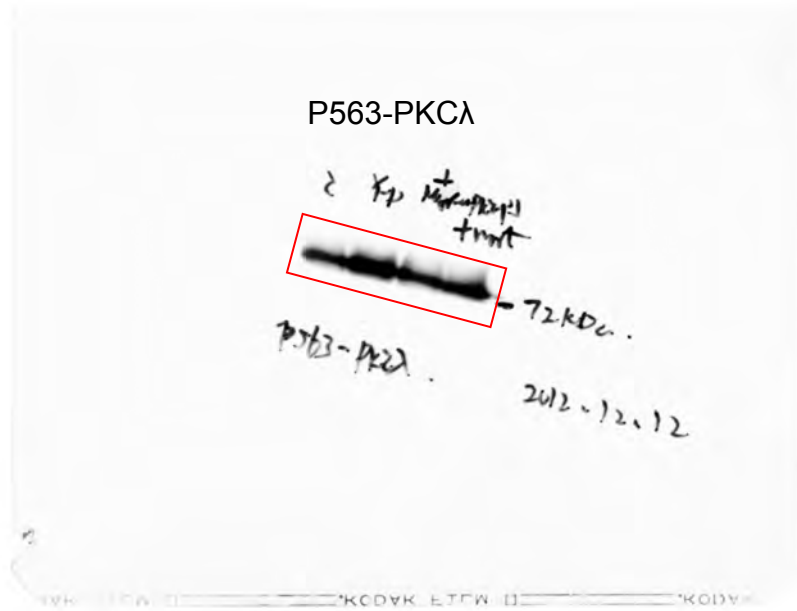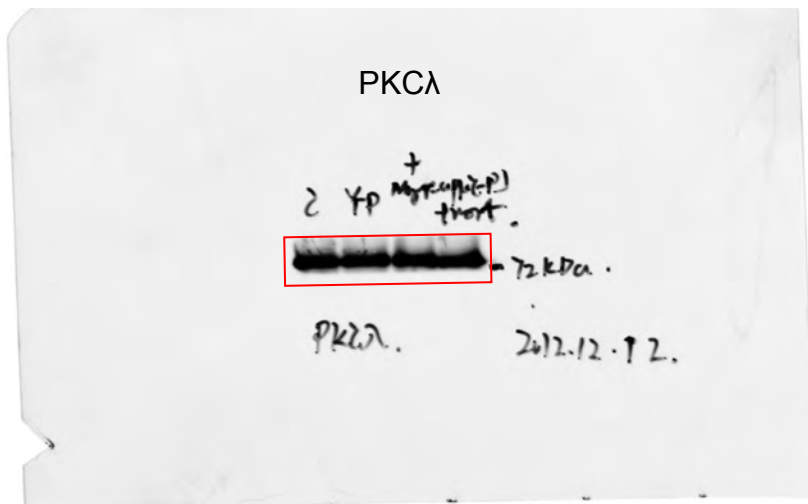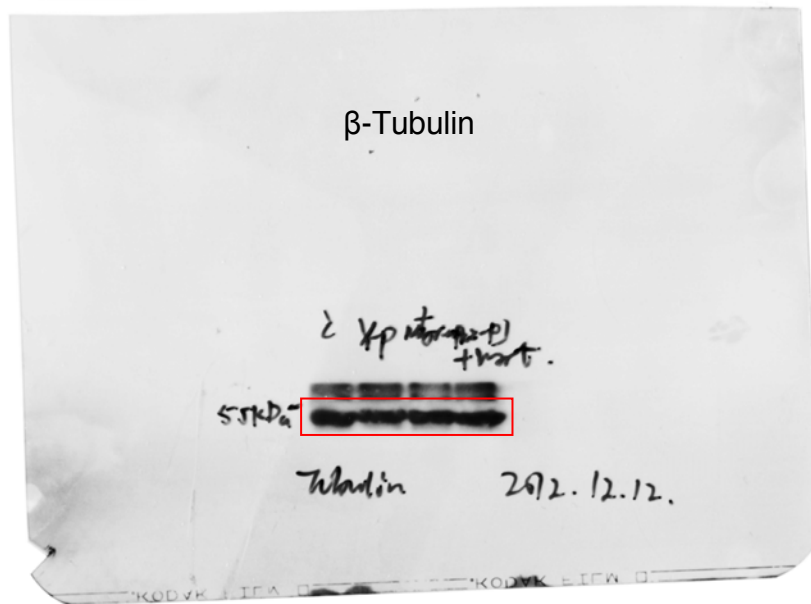

Supplement: emboj201360df2a.pdf [file emboj201360df2a.pdf]

Fig 3 A

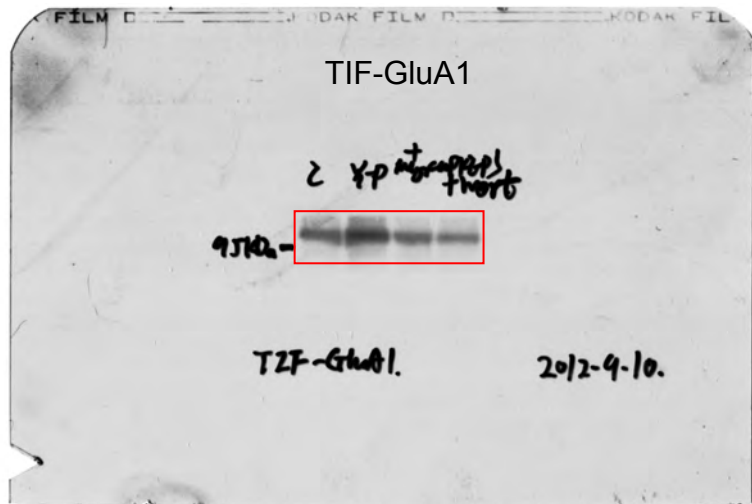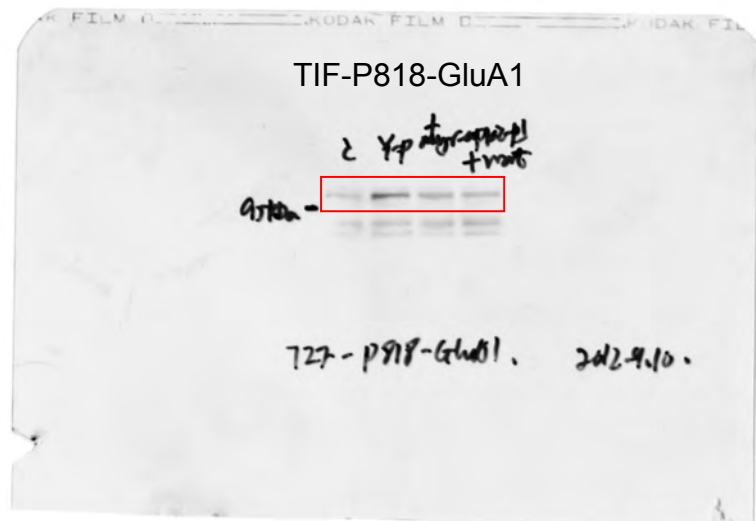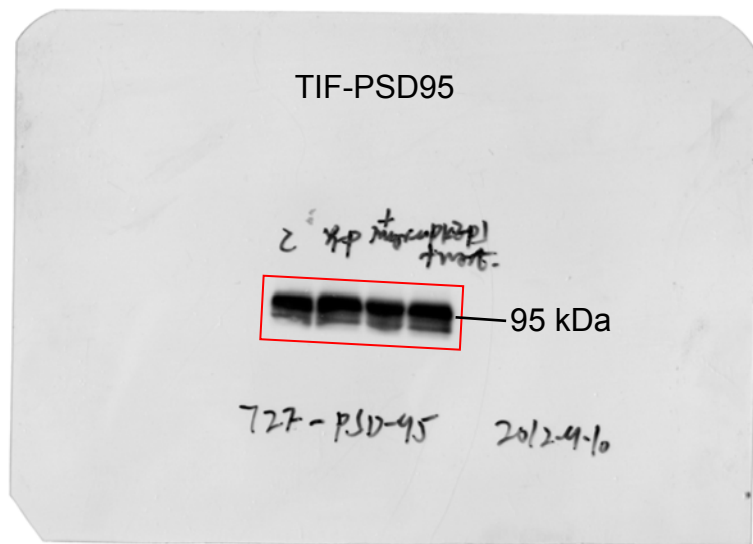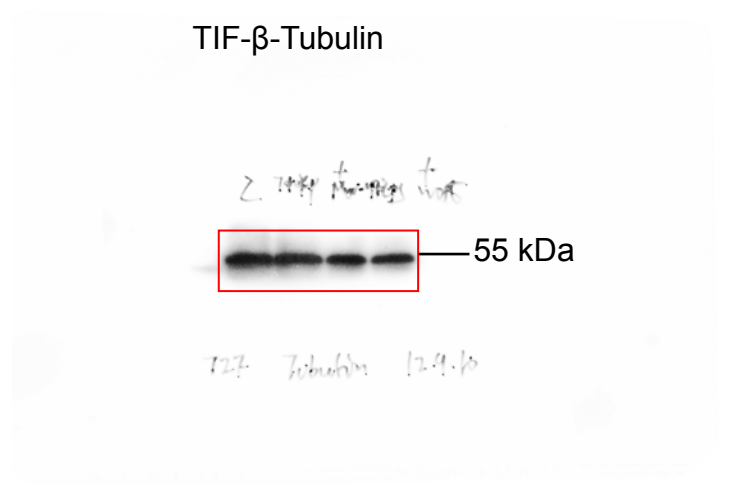

Supplement: emboj201360df3a.pdf [file emboj201360df3a.pdf]

Fig 3 E

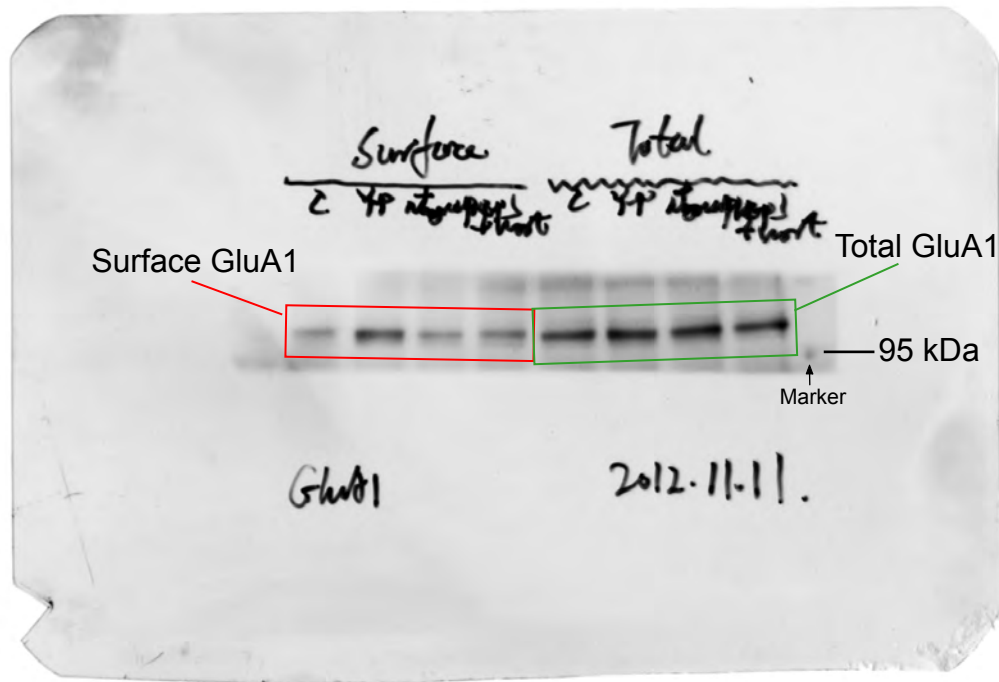

Supplement: emboj201360df3e.pdf [file emboj201360df3e.pdf]

Fig 4A

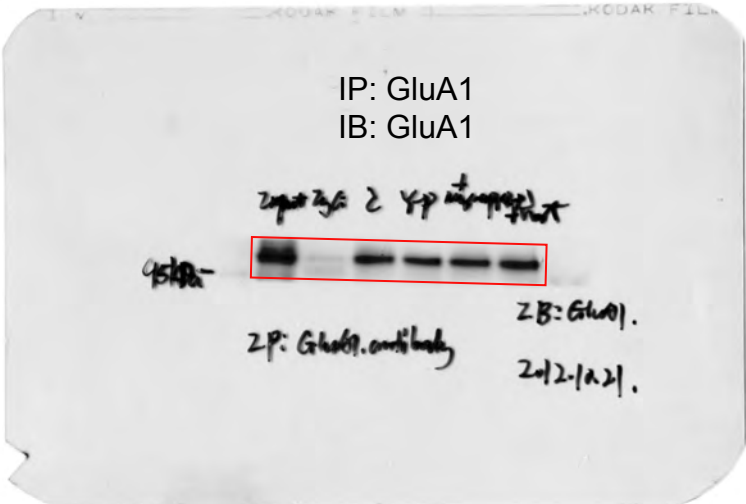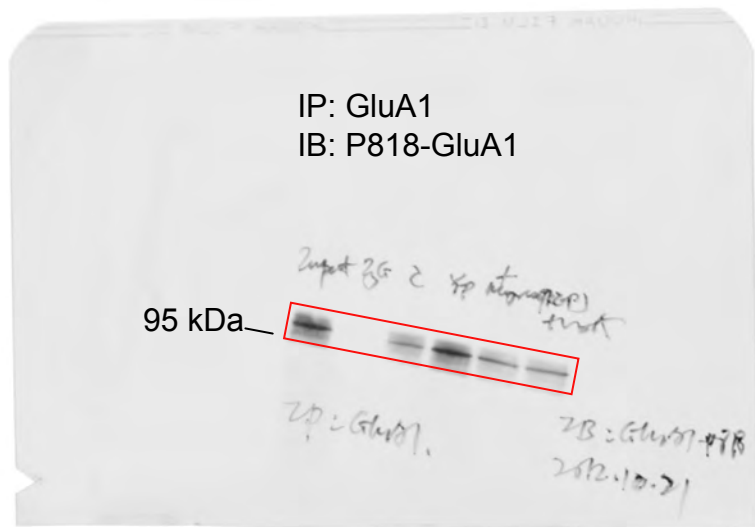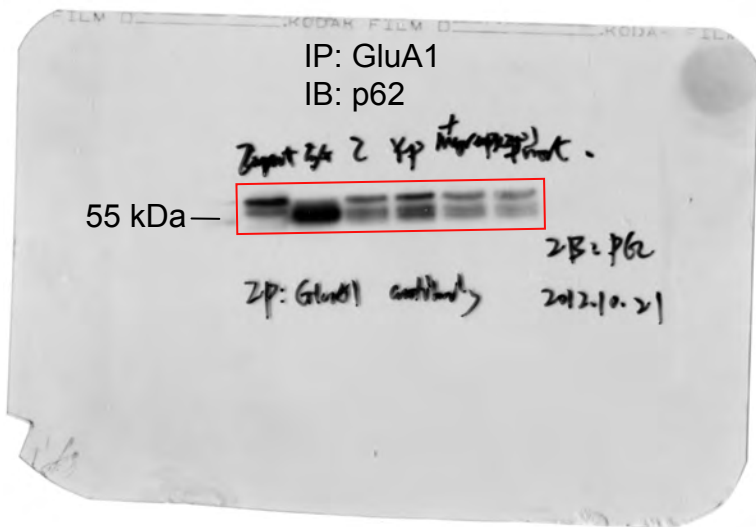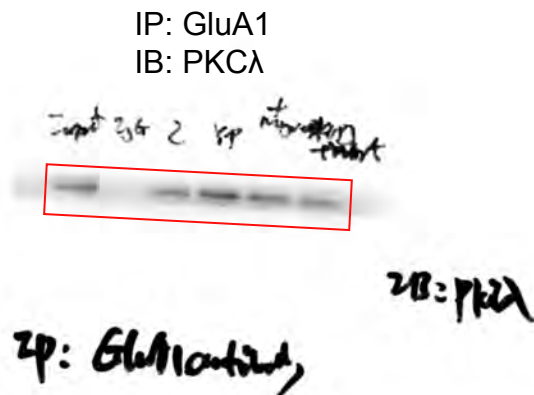

Supplement: emboj201360df4a.pdf [file emboj201360df4a.pdf]

Fig 4C

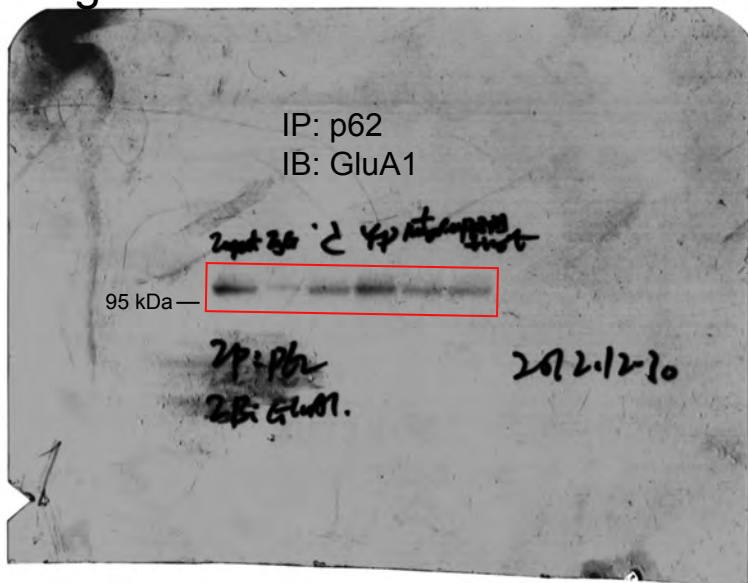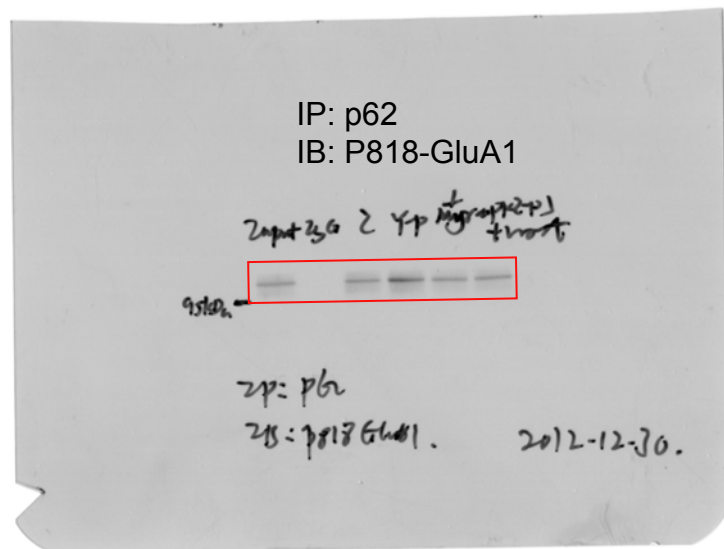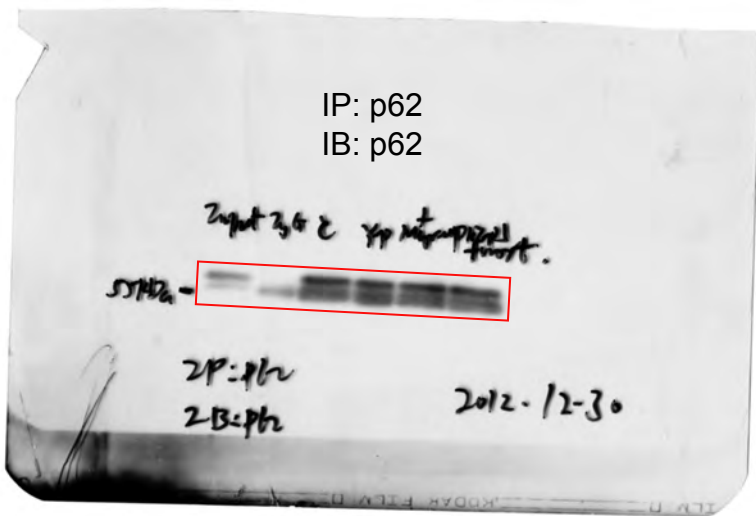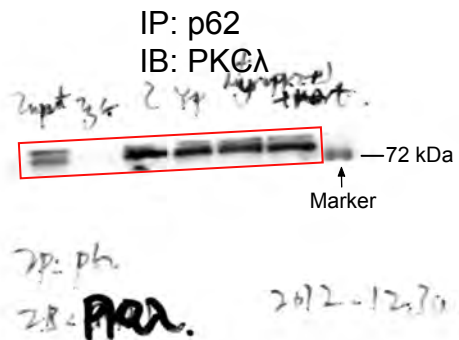

Supplement: emboj201360df4c.pdf [file emboj201360df4c.pdf]

Fig 4E

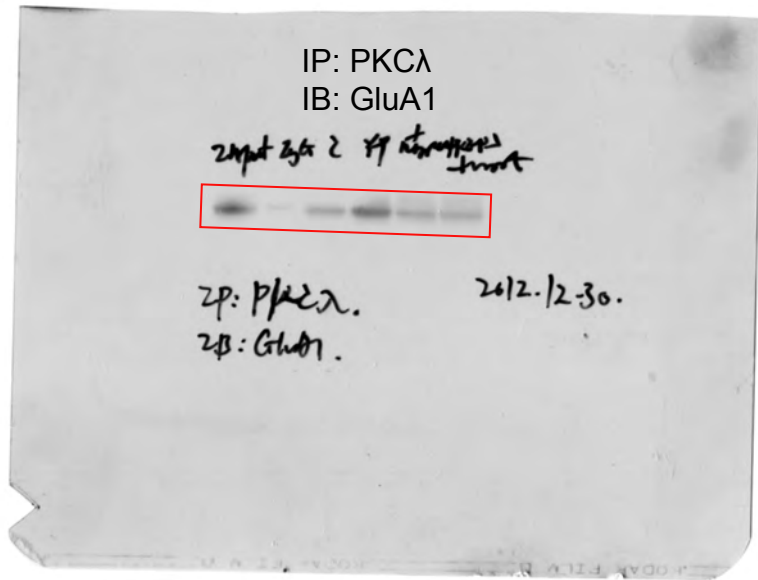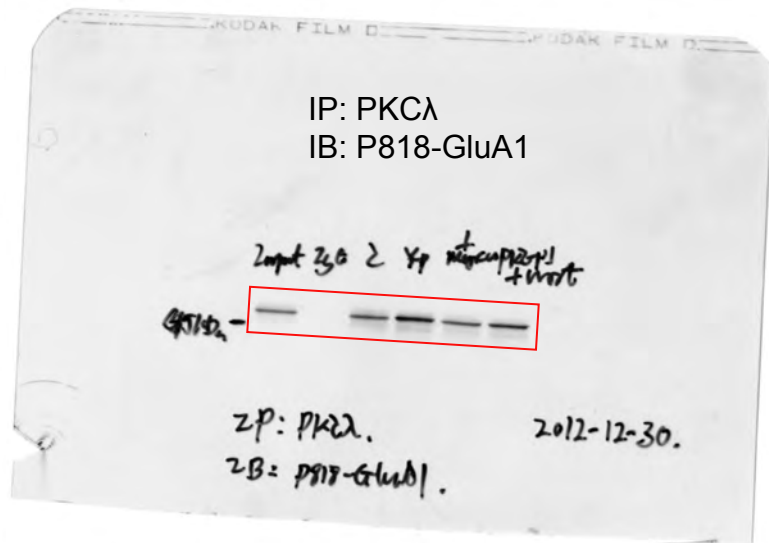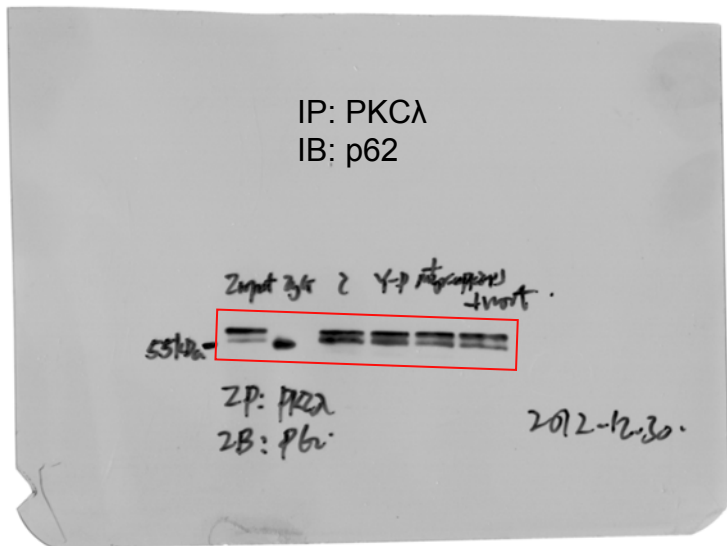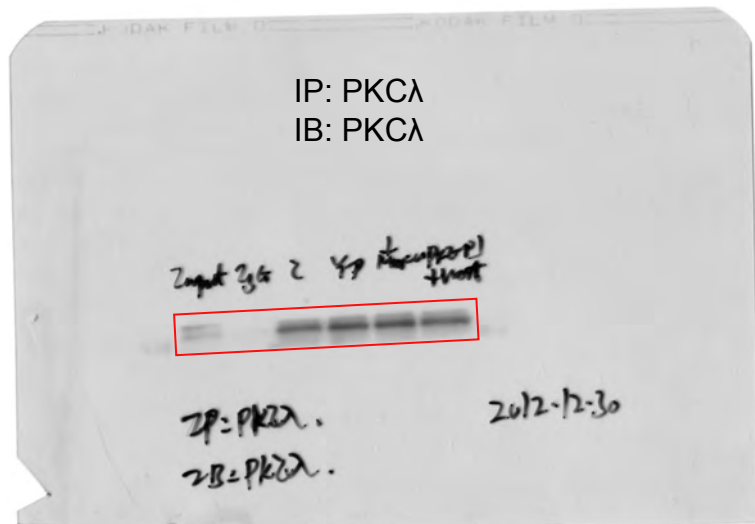

Supplement: emboj201360df4e.pdf [file emboj201360df4e.pdf]

Fig 4H

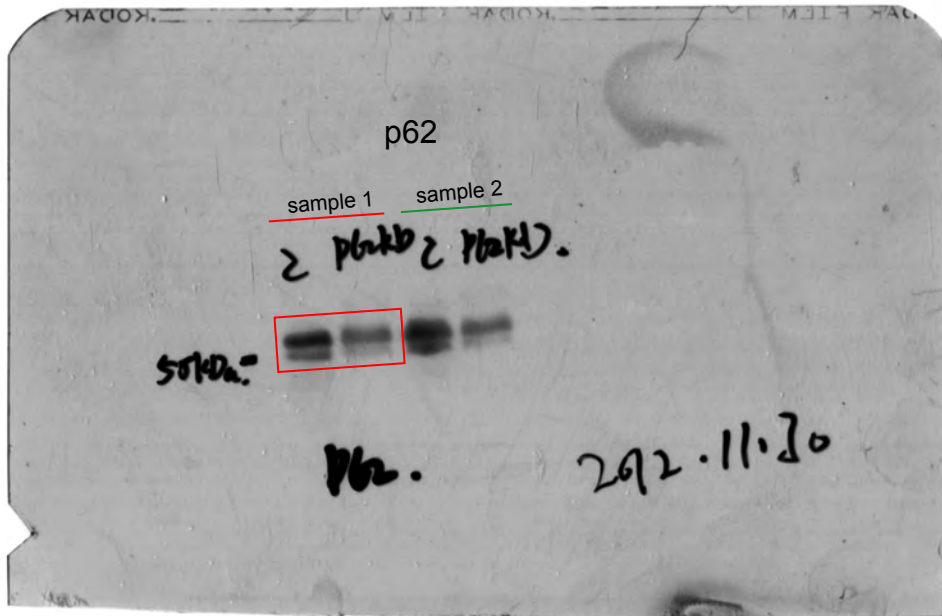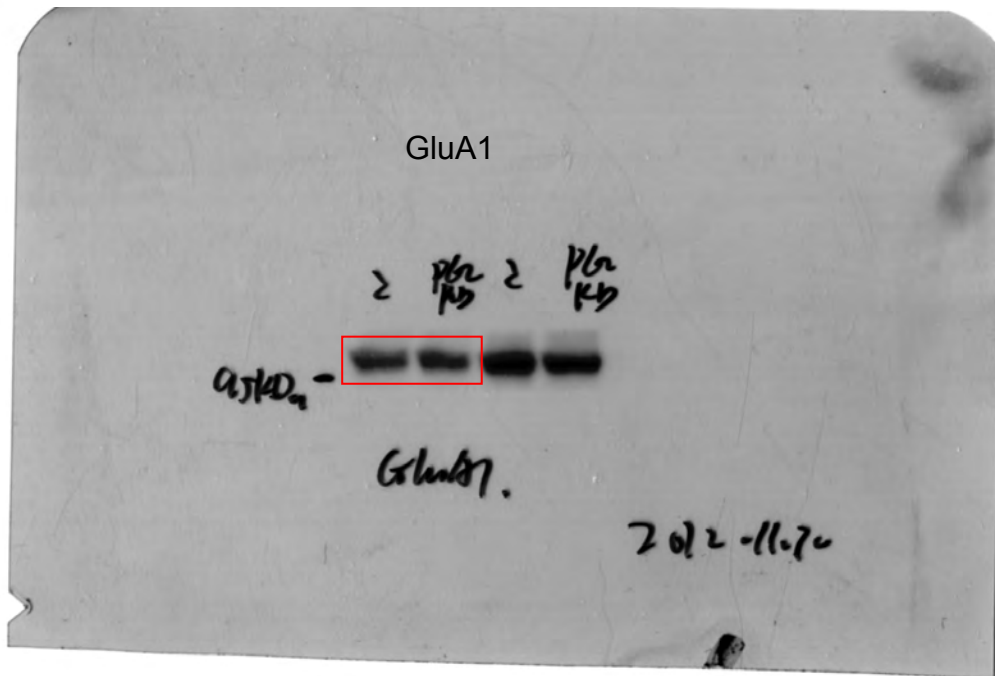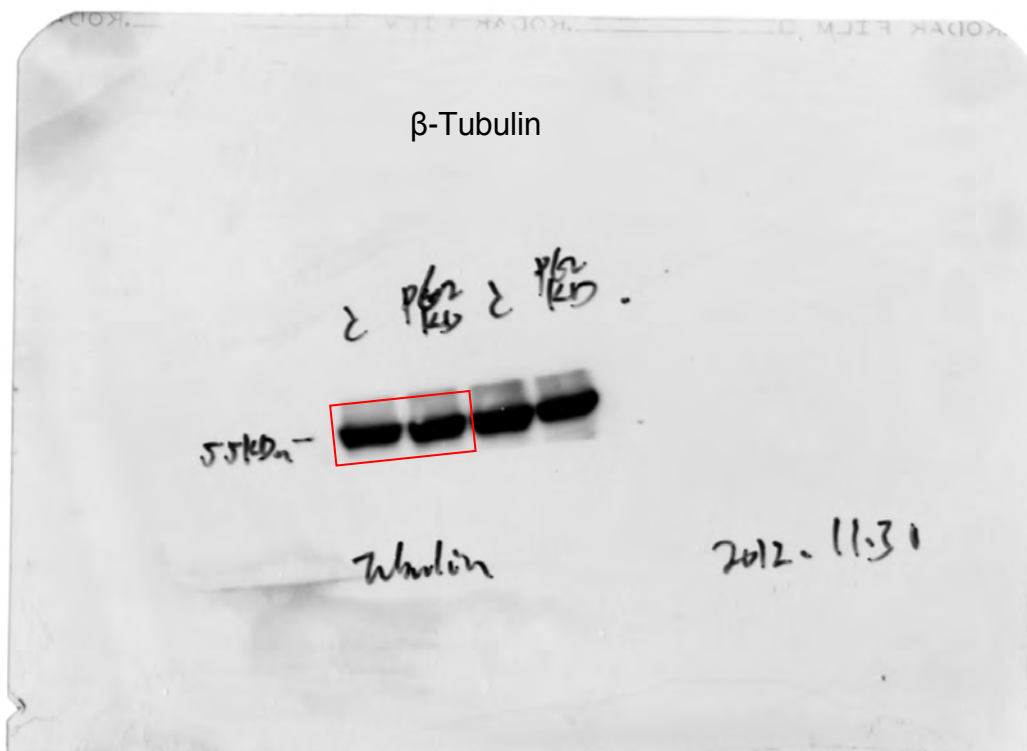

Supplement: emboj201360df4h.pdf [file emboj201360df4h.pdf]

Fig 5C

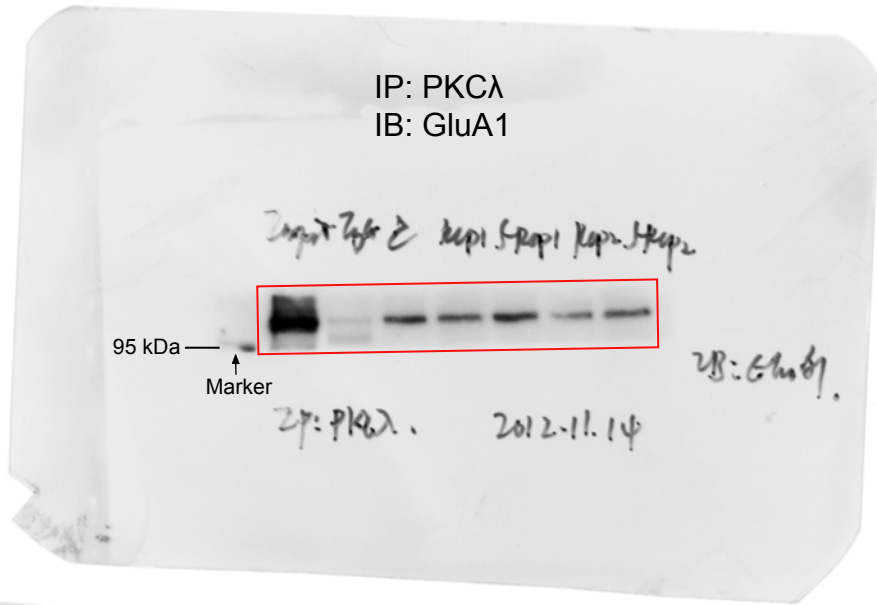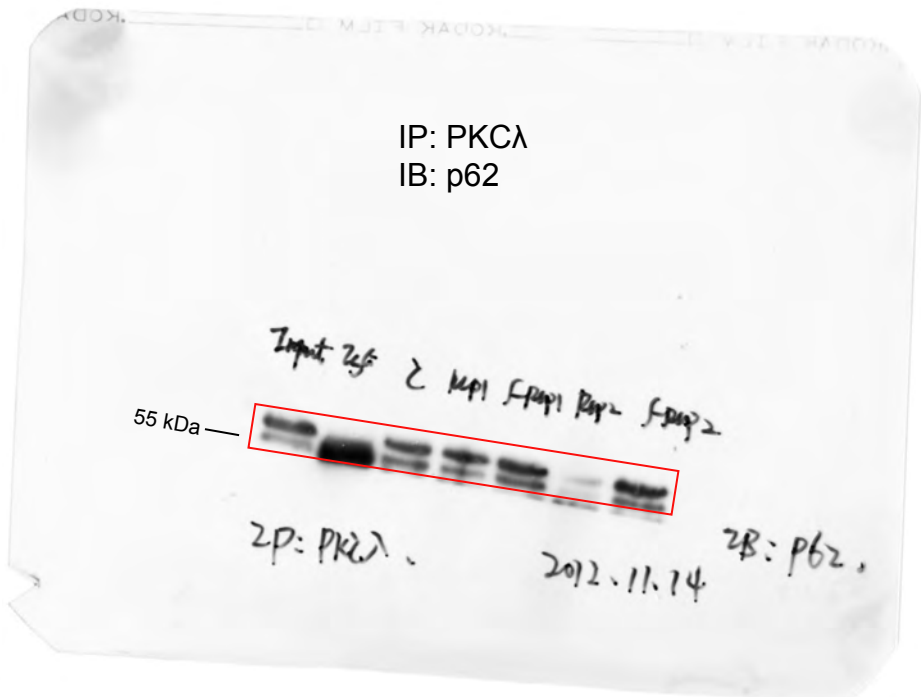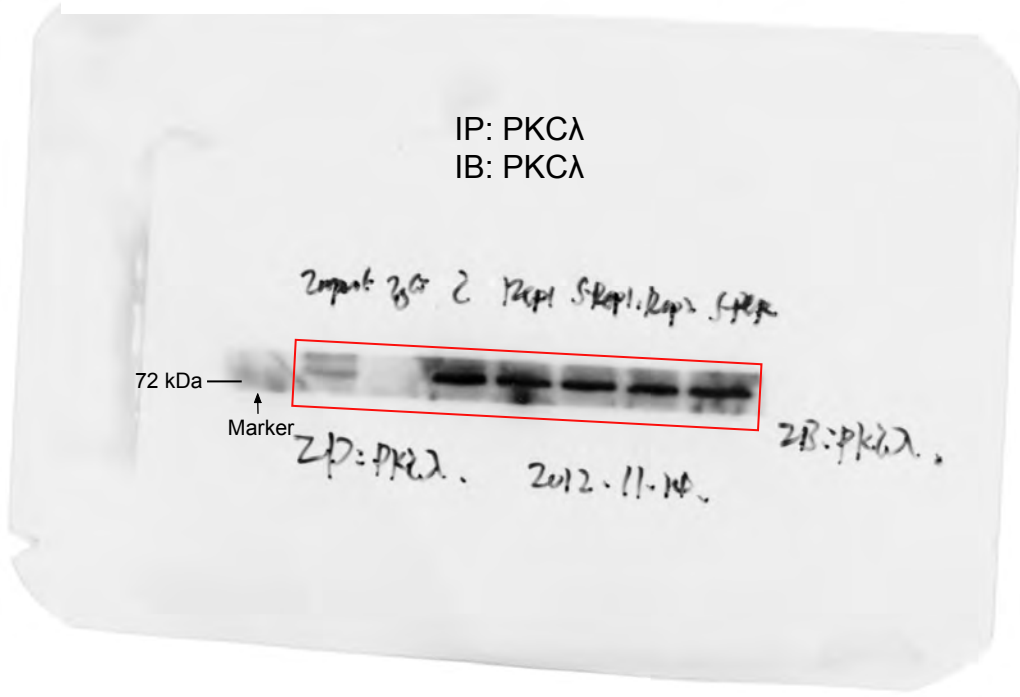

Supplement: emboj201360df5c.pdf [file emboj201360df5c.pdf]

Fig 5D

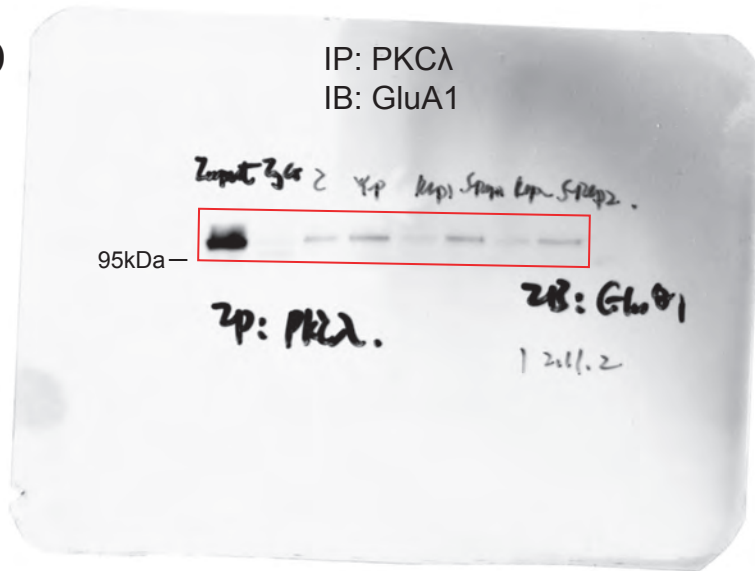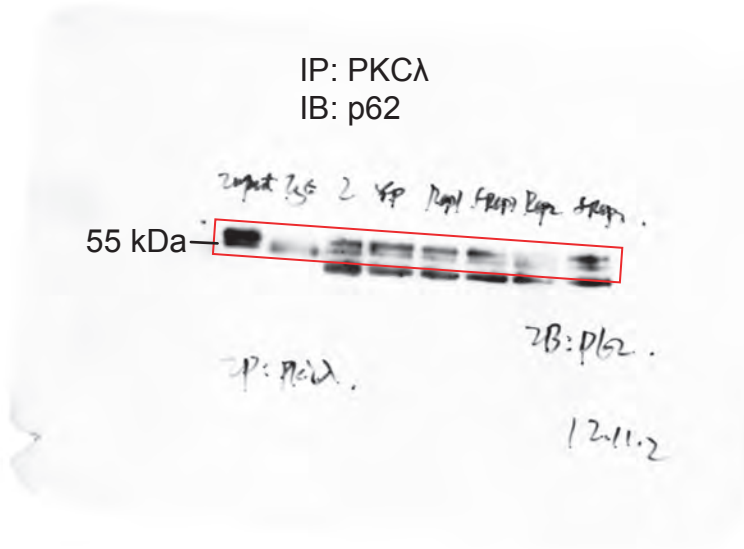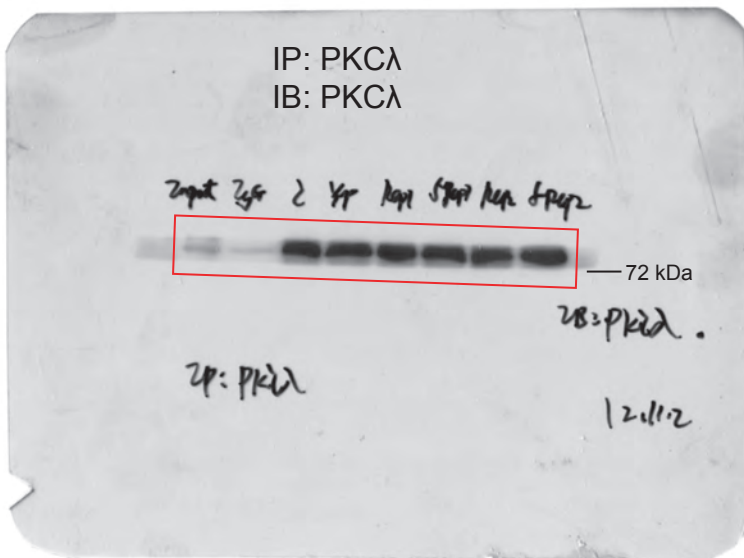

Supplement: emboj201360df5d.pdf [file emboj201360df5d.pdf]

Fig 6A

GluA1

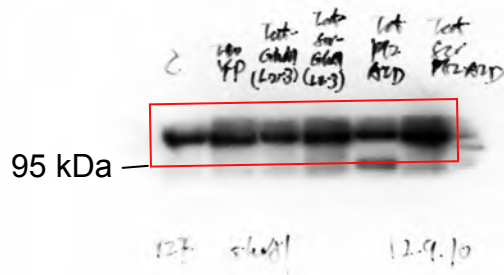

PSD95

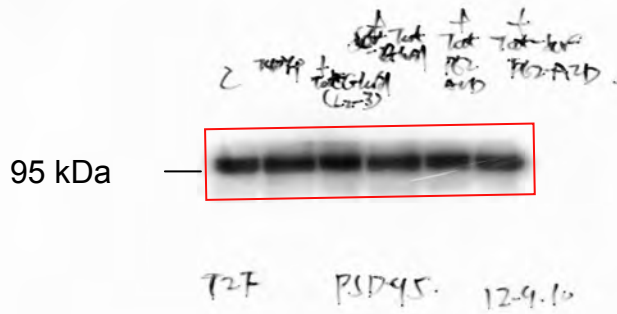

Tubulin

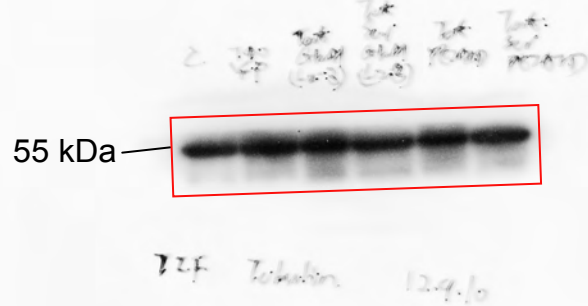

Supplement: emboj201360df6a.pdf [file emboj201360df6a.pdf]
